# Supplementary material for: A microfluidic impedance-based extended infectivity assay: combining retroviral amplification and cytopathic effect monitoring on a single lab-on-a-chip platform
Source: Royal Society of Chemistry journal article supplement (doi:10.1039/d0lc01056a), 2021-01-01
Supplement: d0lc01056a1.pdf [file d0lc01056a1.pdf]

Article

## Supporting information: A microfluidic impedance-based extended infectivity assay: Combining retroviral amplification and cytopathic effects monitoring on a single lab-on-a-chip platform

Received 00th January 20xx,  
Accepted 00th January 20xx

DOI: 10.1039/x0xx00000x

www.rsc.org/

Michaela Purtscher<sup>a,£</sup>, Mario Rothbauer<sup>b,£</sup>, Sebastian Rudi Adam Kratz<sup>b,c</sup>, Andrew Bailey<sup>d</sup>, Peter Lieberzeit<sup>e</sup> and Peter Ertl<sup>b,\*</sup>

### 2. Materials and methods

#### Chip design and fabrication

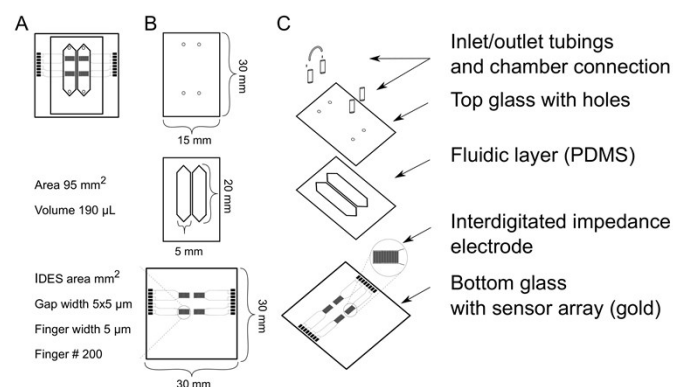

**Figure S1: Schematic overview of the Lab-on-a-chip device: A) representation of the specifications of the assembled device. B) Top view on the single layers, including base with embedded sensors, two-chambered fluidic layer for cell cultures and top layer with holes for connective tubing. C) Exploded isometric perspective of the device.**

<sup>a</sup> University of Applied Sciences FH Technikum Wien, Höchstädtplatz 6, 1200 Vienna, Austria

<sup>b</sup> Faculty of Technical Chemistry, Vienna University of Technology (TUW), Getreidemarkt 9, 1060 Vienna, Austria

<sup>c</sup> Institute of Pharmaceutical Technology and Buchmann Institute for Life Sciences, Goethe University, Max-von-Laue-Straße 15, 60438 Frankfurt am Main, Germany

<sup>d</sup> ViruSure GmbH, Donau-City-Straße 1, 1220 Vienna, Austria

<sup>e</sup> Department of Physical Chemistry, University of Vienna, Währingerstrasse 42, 1090 Vienna, Austria

\*corresponding author: [peter.ertl@tuwien.ac.at](mailto:peter.ertl@tuwien.ac.at) (P.E.)

£ These authors contributed equally

Electronic Supplementary Information (ESI) available: [details of any supplementary information available should be included here]. See DOI: 10.1039/x0xx00000x

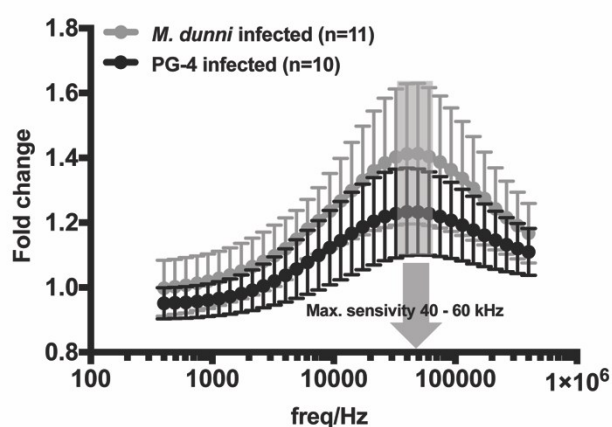

**Figure S2: Analysis of frequency dependent sensor sensitivity of *M. durni* (n=11) and PG-4 (n=10) cultures infected by various titres of the x-MuLV.**

#### A Sensor coverage by *M. durni* cells over culture period

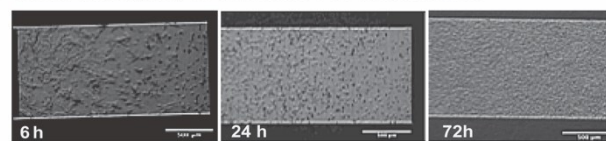

#### B Sensor coverage by PG-4 cells over culture period

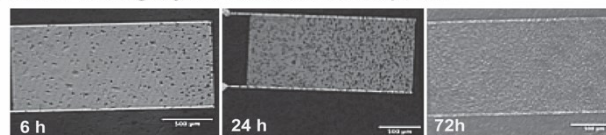

**Figure S3: Sensor cell coverage throughout culture period: A.) and B.) Representative images of healthy *M. durni* and PG-4 cultures at 6, 24 and 72h after cell seeding (scale bar 500 µm).**

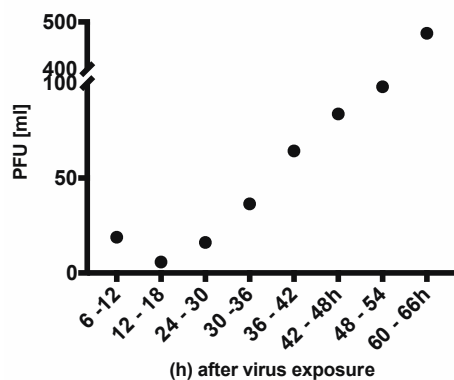

Figure S4: Quantification of PFU/ml in supernatant of *M. dumni* cell cultures inoculated with an initial virus titre of  $7.7 \times 10^3$  PFU/ml 12 h after cell seeding.

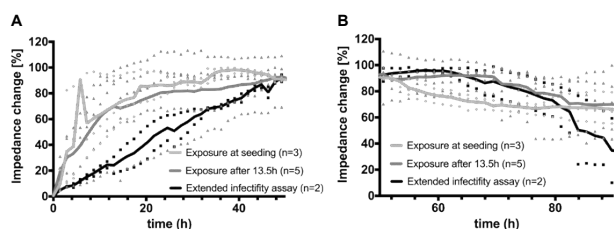

Figure S5: Comparison of impedance traces during assay procedure optimization: A) First 50 h of impedance trace of PG-4 cell cultures exposed with a virus titer of  $2.2 \times 10^5$  PFU/ml at the time point of cell seeding (light grey), virus exposure after 13.5 h (grey) and coupled in dual culture to the propagation cell line (black). B) Close up of the decreasing impedance signals after the onset of cytopathic effects in the PG-4 cultures. (Exposure at seeding reflect the inoculation with virus supernatant at the beginning of the cell culture period with uncoupled chambers, exposure after 13.5 h the cell cycle dependent timed inoculation with uncoupled cell cultures and finally the established extended infectivity assay protocol).

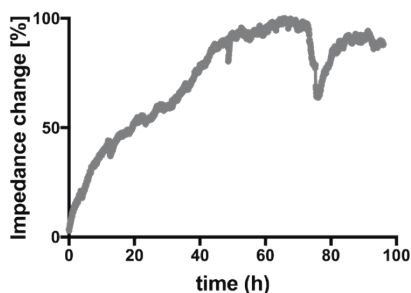

Figure S6: Impedance time trace of PG-4 cells inoculated with a heat inactivated viral supernatant of  $2.2 \times 10^5$  PFU/ml.

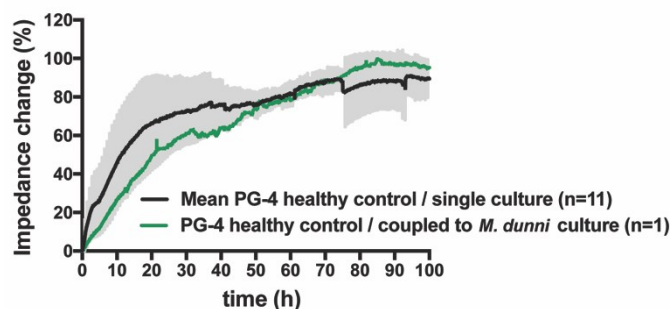

Figure S7: Comparison of growth curve dynamics of PG-4 healthy control coupled to *M. dumni* culture (green) (n=1) to the mean (shaded in grey) of PG-4 healthy control single culture (n=11) over the time course of 100 h shows no significant difference ( data set within  $1 \sigma$ ).
